# Supplementary material for: B-cell dynamics during experimental endotoxemia in humans
Source: Oxford University Press journal article supplement (doi:10.1042/bsr20182347), 2019-04-08

# Supplemental Figure S1

**A**

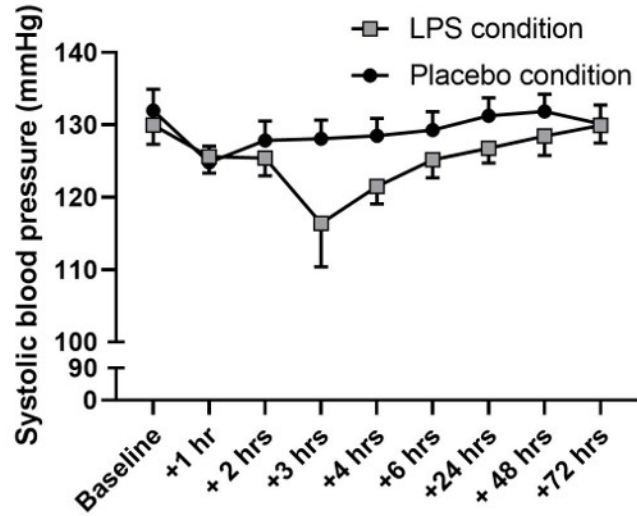

**B**

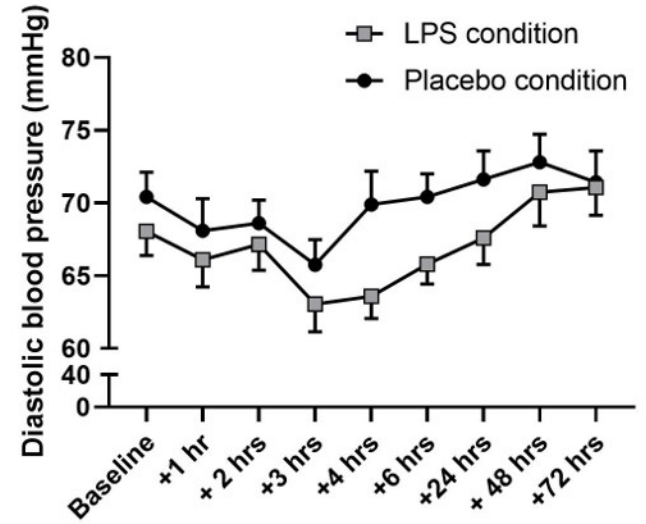

**C**

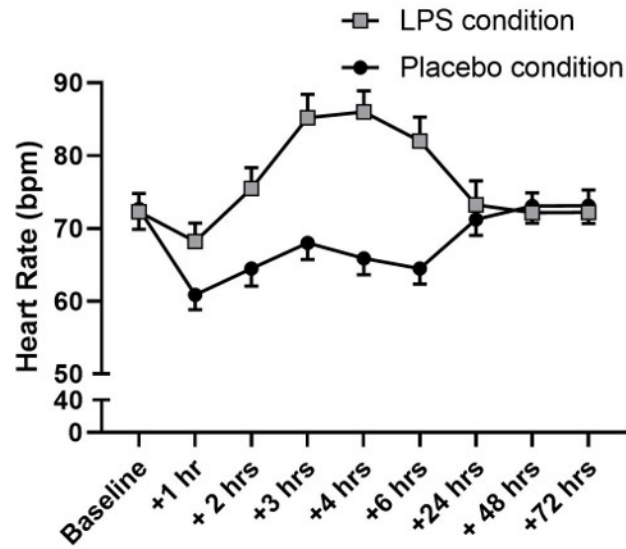

**D**

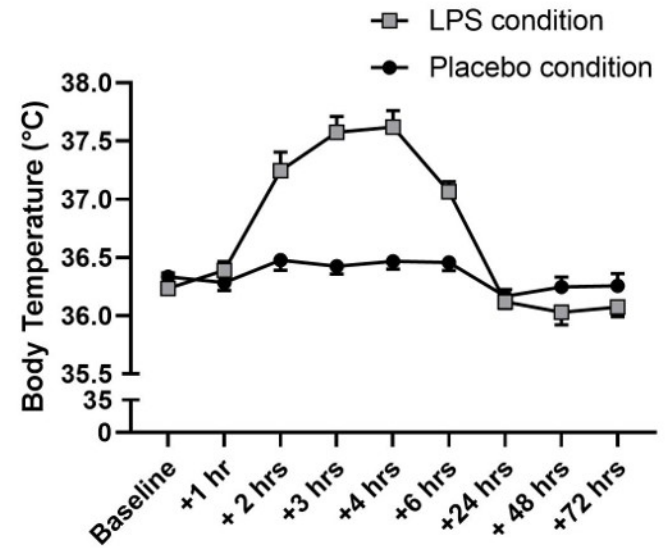

Supplement: bsr-2018-2347_supp.pdf [file bsr-2018-2347_supp.pdf]
